# Supplementary material for: Genetic variation and factors affecting the genetic structure of the lichenicolous fungus Heterocephalacria bachmannii (Filobasidiales, Basidiomycota)
Source: PLoS One. 2017 Dec 18;12(12):e0189603. doi: 10.1371/journal.pone.0189603 (PMC5734755; doi:10.1371/journal.pone.0189603)
Supplement: S5 Table — (XLSX) [file pone.0189603.s007.xlsx]

## Sheet: GenBank accession numbers
	S5 Table. GenBank accession numbers of Heterocephalacria bachmannii and Cladonia rangiformis
			GenBank accession number of parasite				GenBank accession number of Host
	Population	Host species	Code	ITS	LSU	mtLSU	ITS	LSU	IGS
	Canada, Yukon Territory, Alaska Hwy (H)	Cladonia cornuta	RP103	MG553433	MG553253	MG553559
	Canada, Yukon Territory, Klondike Hwy (H)	Cladonia macroceras	RP78	MG553544	MG553372	MG553630
	Costa Rica, Cartago (H)	Cladonia granulosa	RP19	MG553460	MG553280	—
	Croatia, Lika-senj, Mt. Velebit	Cladonia furcata	RP349	MG553507	MG553328	—
	Denmark, Faroe Island, Viðoy Island, Viðareiðy (H)	Cladonia gracilis	RP161	MG553448	MG553268	MG553569
	Denmark, Sjælland, Asserbo Plantage (H)	Cladonia rangiformis	RP390	MG553526	MG553339	—	MG553428
	Denmark, Sjælland, Asserbo Plantage (H)	Cladonia furcata	RP430	MG553543	MG553357	—
	Finland, Kainuu, Sotkamo (H)	Cladonia coniocraea	RP256	MG553474	MG553295	—
	Finland, Southwest Finland, Salo	Cladonia gracilis	RP365	MG553510	MG553331	—
	Finland, Southwest Finland, Salo	Cladonia gracilis	RP366	MG553511	MG553332	MG553606
	Finland, Southwest Finland, Salo	Cladonia gracilis	RP367	MG553512	MG553333	MG553607
	Finland, Southwest Finland, Salo	Cladonia gracilis	RP368	MG553513	—	MG553608
	Finland, Southwest Finland, Salo	Cladonia gracilis	RP369	MG553514	MG553363	MG553609
	Finland, Southwest Finland, Salo	Cladonia gracilis	RP370	MG553515	MG553334	MG553610
	Finland, Southwest Finland, Salo	Cladonia mitis	RP371	MG553516	MG553335	—
	Finland, Southwest Finland, Salo	Cladonia mitis	RP377	MG553519	MG553337	—
	Finland, Tavastia Proper, Torronsuo	Cladonia stygia	RP255	MG553473	MG553294	—
	Finland, Uusimaa, Espoo, Luukkaa Recreation Area	Cladonia furcata	RP172	MG553452	MG553272	MG553573
	Finland, Uusimaa, Espoo, Luukkaa Recreation Area	Cladonia furcata	RP173	MG553453	MG553273	MG553574
	Finland, Uusimaa, Espoo, Luukkaa Recreation Area	Cladonia phyllophora	RP174	MG553454	MG553274	MG553575
	Finland, Uusimaa, Espoo, Ramsö	Cladonia gracilis	RP378	—	MG553338	—
	Finland, Uusimaa, Espoo, Ramsö	Cladonia gracilis	RP379	MG553520	MG553341	MG553613
	Finland, Uusimaa, Espoo, Ramsö	Cladonia gracilis	RP380	MG553521	MG553342	MG553614
	Finland, Uusimaa, Kirkkonummi	Cladonia gracilis	RP374	MG553517	MG553336	MG553611
	Finland, Uusimaa, Kirkkonummi	Cladonia gracilis	RP375	—	MG553364	—
	Finland, Uusimaa, Kirkkonummi	Cladonia gracilis	RP376	MG553518	—	MG553612
	Greece, East Macedonia and Thrace, Thassos island	Cladonia uncialis subsp. biuncialis	RP153	MG553444	MG553264	—
	Greece, Macedonia-Tracia, Agios Nikolaus	Cladonia cervicornis	RP384	—	MG553365	—
	Greece, Macedonia-Tracia, Agios Nikolaus	Cladonia cervicornis	RP386	—	MG553366	—
	Greece, Macedonia-Tracia, Agios Nikolaus	Cladonia furcata	RP387	MG553524	MG553355	MG553617
	Greece, Macedonia-Tracia, Agios Nikolaus	Cladonia furcata	RP388	MG553525	MG553356	—
	Greece, Macedonia-Tracia, Agios Nikolaus	Cladonia furcata	RP389	—	MG553367	—
	Greece, Macedonia-Tracia, Agios Nikolaus	Cladonia furcata	RP405	MG553531	MG553361	MG553621
	Greece, Macedonia-Tracia, Polygyros	Cladonia furcata	RP382	—	—	MG553615
	Greece, Macedonia-Tracia, Polygyros	Cladonia furcata	RP383	MG553523	MG553344	MG553616
	Portugal, Beira Baixa, Proença-a-Nova	Cladonia uncialis	RP418	MG553541	MG553353	MG553629
	Portugal, Madeira island, Levada do Furado	Cladonia stereoclada	RP419	MG553542	MG553354	—
	Portugal, Minho, Castro Laboreiro	Cladonia ramulosa	RP231	MG553465	MG553285	MG553582
	Portugal, Minho, Castro Laboreiro	Cladonia ramulosa	RP232	MG553466	MG553286	MG553583
	Portugal, Minho, Peneda	Cladonia ramulosa	RP228	MG553462	MG553282	MG553579
	Portugal, Minho, Peneda	Cladonia ramulosa	RP229	MG553463	MG553283	MG553580
	Portugal, Minho, Peneda	Cladonia ramulosa	RP230	MG553464	MG553284	MG553581
	Portugal, Minho, Peneda	Cladonia ramulosa	RP403	MG553529	MG553359	MG553619
	Portugal, Minho, Peneda	Cladonia ramulosa	RP404	MG553530	MG553360	MG553620
	Portugal, The Azores, Flores, Ponta Delgada	Cladonia stereoclada	RP315	MG553479	MG553300	—
	Portugal, The Azores, Flores, Ponta Delgada	Cladonia stereoclada	RP316	MG553480	MG553301	—
	Portugal, The Azores, Flores, Reserva Florestal Natural das Caldeiras Funda e Rasa	Cladonia rangiformis	RP317	MG553481	MG553302	MG553591	MG553415	MG553384	MG553230
	Portugal, The Azores, Flores, Reserva Florestal Natural das Caldeiras Funda e Rasa	Cladonia rangiformis	RP318	MG553482	MG553303	MG553592	MG553416	MG553385	MG553231
	Portugal, The Azores, Flores, Reserva Florestal Natural das Caldeiras Funda e Rasa	Cladonia rangiformis	RP319	MG553483	MG553304	MG553593	MG553417		MG553232
	Portugal, The Azores, Flores, Reserva Florestal Natural do Morro Alto e Pico da Se	Cladonia rangiformis	RP320	MG553484	MG553305	MG553594	MG553418	MG553386	MG553233
	Portugal, The Azores, Flores, Reserva Florestal Natural do Morro Alto e Pico da Se	Cladonia rangiformis	RP321	MG553485	MG553306	MG553595	MG553419	MG553387	MG553234
	Portugal, The Azores, Flores, Reserva Florestal Natural do Morro Alto e Pico da Se	Cladonia rangiformis	RP322	MG553486	MG553307	MG553596	MG553420	MG553388	MG553235
	Portugal, The Azores, Pico Currais do Morais	Cladonia rangiformis	RP330	MG553494	MG553315	MG553600		MG553392	MG553239
	Portugal, The Azores, Pico Currais do Morais	Cladonia stereoclada	RP331	MG553495	MG553316	—
	Portugal, The Azores, Pico Currais do Morais	Cladonia stereoclada	RP332	MG553496	MG553317	MG553601
	Portugal, The Azores, Pico, Baia das Canas	Cladonia squamosa	RP343	MG553506	MG553327	—
	Portugal, The Azores, Pico, Cabeço Gordo	Cladonia rangiformis	RP323	MG553487	MG553308	MG553597	MG553421	MG553389	MG553236
	Portugal, The Azores, Pico, Cabeço Gordo	Cladonia stereoclada	RP324	MG553488	MG553309	MG553598
	Portugal, The Azores, Pico, Cabeço Gordo	Cladonia rangiformis	RP325	MG553489	MG553310	MG553599	MG553422	MG553390	MG553237
	Portugal, The Azores, Pico, Cais do Mourato	Cladonia squamosa	RP341	MG553505	MG553326	—
	Portugal, The Azores, Pico, EN3-EN2	Cladonia stereoclada	RP326	MG553490	MG553311	—
	Portugal, The Azores, Pico, EN3-EN2	Cladonia stereoclada	RP327	MG553491	MG553312	—
	Portugal, The Azores, Pico, lakes	Cladonia stereoclada	RP328	MG553492	MG553313	—
	Portugal, The Azores, Pico, lakes	Cladonia stereoclada	RP329	MG553493	MG553314	—
	Portugal, The Azores, Pico, Road EN3	Cladonia stereoclada	RP333	MG553497	MG553318	—
	Portugal, The Azores, Pico, Road EN3	Cladonia stereoclada	RP334	MG553498	MG553319	MG553602
	Portugal, The Azores, Pico, Road EN3	Cladonia stereoclada	RP335	MG553499	MG553320	—
	Portugal, The Azores, Terceira, Fontinhas	Cladonia rangiformis	RP336	MG553500	MG553321	MG553603	MG553423	MG553393	MG553240
	Portugal, The Azores, Terceira, Fontinhas	Cladonia rangiformis	RP337	MG553501	MG553322	—	MG553424	MG553394	MG553241
	Portugal, The Azores, Terceira, Fontinhas	Cladonia rangiformis	RP338	MG553502	MG553323	—	MG553425	MG553395	MG553242
	Portugal, The Azores, Terceira, Road EN5-2A	Cladonia rangiformis	RP339	MG553503	MG553324	MG553604	MG553426	MG553396	MG553243
	Portugal, The Azores, Terceira, Road EN5-2A	Cladonia rangiformis	RP340	MG553504	MG553325	—	MG553427	MG553397	MG553244
	Russia, Caucasus, Karachaevo-Cherkesiya Republic, Teberda (LE)	Cladonia pyxidata	RP350	MG553508	MG553329	MG553605
	Russia, Caucasus, Krasnodar Territory, Mt. Armovka (LE)	Cladonia coniocraea	RP254	MG553472	MG553293	—
	Russia, Caucasus, Krasnodar Territory, Mt. Fisht (LE)	Cladonia pyxidata	RP245	MG553469	MG553289	MG553585
	Russia, Caucasus, Krasnodar Territory, Mt. Fisht (LE)	Cladonia pyxidata	RP253	MG553471	MG553292	MG553587
	Russia, Primorye Territory, Golubichnaya River (LE)	Cladonia cervicornis	RP248	—	MG553290	—
	Russia, Primorye Territory, Zabolochennaya River (LE)	Cladonia macilenta	RP252	MG553470	MG553291	MG553586
	Sewden, Öland	Cladonia rangiformis	RP409	—	MG553371	—			MG553245
	Spain, Cáceres, between Puerto de San Vicente and Alias	Cladonia rangiformis	RP410	MG553533	MG553345	MG553622	MG553429	MG553398	MG553246
	Spain, Cáceres, between Puerto de San Vicente and Alias	Cladonia foliacea	RP411	MG553534	MG553346	—
	Spain, Cáceres, Guadalupe (MACB)	Cladonia uncialis	RP20	MG553461	MG553281	—
	Spain, Salamanca, La Alberca (MACB)	Cladonia uncialis	RP407	—	MG553369	—
	Spain, Salamanca, La Alberca (MACB)	Cladonia uncialis	RP408	—	MG553370	—
	Spain, Soria, Matalebrera	Cladonia rangiformis	RP114	MG553436	MG553256	MG553562
	Spain, Soria, Muriel Viejo (MACB)	Cladonia uncialis	RP398	MG553527	MG553340	MG553618
	Spain, Soria, Muriel Viejo (MACB)	Cladonia furcata	RP399	—	MG553368	—
	Spain, Soria, Muriel Viejo (MACB)	Cladonia uncialis	RP406	MG553532	MG553362	—
	Spain, Toledo, Aldeanueva de Barbarroya	Cladonia rangiformis	RP113	MG553435	MG553255	MG553561	MG553403	MG553375	MG553220
	Spain, Toledo, Aldeanueva de Barbarroya	Cladonia rangiformis	RP142	MG553442	MG553262	MG553565	MG553408
	Spain, Toledo, Aldeanueva de Barbarroya	Cladonia rangiformis	RP143	MG553443	MG553263	MG553566	MG553409	MG553379	MG553225
	Spain, Toledo, Aldeanueva de Barbarroya	Cladonia furcata	RP351	MG553509	MG553330	—
	Spain, Toledo, Las Hunfrías	Cladonia rangiformis	RP412	MG553535	MG553347	MG553623	MG553430	MG553399	MG553247
	Spain, Toledo, Las Hunfrías	Cladonia rangiformis	RP413	MG553536	MG553348	MG553624	MG553431	MG553400	MG553248
	Spain, Toledo, Las Hunfrías	Cladonia rangiformis	RP414	MG553537	MG553349	MG553625	MG553432	MG553401	MG553249
	Spain, Toledo, Navaltoril	Cladonia glauca	RP415	MG553538	MG553350	MG553626
	Spain, Toledo, Navaltoril	Cladonia glauca	RP416	MG553539	MG553351	MG553627
	Spain, Toledo, Navaltoril	Cladonia glauca	RP417	MG553540	MG553352	MG553628
	Spain, Toledo, Sevilleja de la Jara	Cladonia rangiformis	RP289	MG553475	MG553296	—	MG553411	MG553381	MG553227
	Spain, Toledo, Sevilleja de la Jara	Cladonia rangiformis	RP291	MG553476	MG553297	MG553588	MG553412	MG553382
	Spain, Toledo, Torrico	Cladonia rangiformis	RP293	MG553477	MG553298	MG553589	MG553413	MG553383	MG553228
	Spain, Toledo, Torrico	Cladonia rangiformis	RP294	MG553478	MG553299	MG553590	MG553414		MG553229
	Spain, Zaragoza, Tarazona	Cladonia rangiformis	RP115	MG553437	MG553257	MG553563	MG553404	MG553376	MG553221
	Spain, Zaragoza, Tarazona	Cladonia rangiformis	RP141	MG553441	MG553261	—	MG553407		MG553224
	Spain, Zaragoza, Vera del Mocayo	Cladonia rangiformis	RP112	MG553434	MG553254	MG553560	MG553402	MG553374	MG553219
	Spain, Zaragoza, Vera del Mocayo	Cladonia foliacea	RP116	MG553438	MG553258	MG553564
	Spain, Zaragoza, Vera del Mocayo	Cladonia rangiformis	RP139	MG553440	MG553260	—	MG553405	MG553377	MG553222
	Spain, Zaragoza, Vera del Mocayo	Cladonia rangiformis	RP155	MG553446	MG553266	MG553567	MG553410	MG553380	MG553226
	Spain, Zaragoza, Vera del Mocayo	Cladonia foliacea	RP156	MG553447	MG553267	MG553568
	Turkey, Kastamonu, Ilgaz Dağı	Cladonia coniocraea	RP177	MG553457	MG553277	MG553577
	Turkey, Kastamonu, Pınarbaşı	Cladonia coniocraea	RP175	MG553455	MG553275	—
	Turkey, Kastamonu, Pınarbaşı	Cladonia coniocraea	RP176	MG553456	MG553276	MG553576
	Turkey, Rize-İkizdere	Cladonia furcata	RP169	MG553449	MG553269	MG553570
	Turkey, Rize-İkizdere	Cladonia furcata	RP170	MG553450	MG553270	MG553571
	Turkey, Rize-İkizdere	Cladonia furcata	RP171	MG553451	MG553271	MG553572
	Turkey, Çankırı	Cladonia pyxidata	RP178	MG553458	MG553278	MG553578
	Turkey, Çankırı	Cladonia pyxidata	RP240	MG553468	MG553288	MG553584
	Turkey, Ordu, Çambaşı district, Road of Çambaşı plateau	Cladonia furcata	RP381	MG553522	MG553343	—
	USA, Alaska, Noatak Preserve (H)	Cladonia gracilis subsp. vulnerata	RP12	MG553439	MG553259	—
	USA, Alaska, Unalga Island (H)	Cladonia uncialis	RP400	MG553528	MG553358	—
	USA, Alaska, Unimak Island, 1.5 Km Airstrip (H)	Cladonia crispata var. cetrariformis	RP154	MG553445	MG553265	—
	USA, Alaska, Unimak Island, 3 Km Airstrip (H)	Cladonia crispata var. cetrariformis	RP180	MG553459	MG553279	—
	USA, Tennessee, Cocke Co. (H)	Cladonia furcata	RP24	MG553467	MG553287	—

## Sheet: Hoja3
SUB3240036
SUB3240036
SUB3240036
SUB3240036
SUB3240036
SUB3240036
SUB3240036
SUB3240036
SUB3240036
SUB3240036
SUB3240036
SUB3240036
SUB3240036
SUB3240036
SUB3240036
SUB3240036
SUB3240036
SUB3240036
SUB3240036
SUB3240036
SUB3240036
SUB3240036
SUB3240036
SUB3240036
SUB3240036
SUB3240036
SUB3240036
SUB3240036
SUB3240036
SUB3240036
SUB3240036
SUB3240036
SUB3240036
SUB3240036
SUB3240036
SUB3240036
SUB3240036
SUB3240036
SUB3240036
SUB3240036
SUB3240036
SUB3240036
SUB3240036
SUB3240036
SUB3240036
SUB3240036
SUB3240036
SUB3240036
SUB3240036
SUB3240036
SUB3240036
SUB3240036
SUB3240036
SUB3240036
SUB3240036
SUB3240036
SUB3240036
SUB3240036
SUB3240036
SUB3240036
SUB3240036
SUB3240036
SUB3240036
SUB3240036
SUB3240036
SUB3240036
SUB3240036
SUB3240036
SUB3240036
SUB3240036
SUB3240036
SUB3240036
